# Supplementary material for: Disambiguating the Psychiatric Sequelae of Parkinson’s Disease, Deep Brain Stimulation, and Life Events: Case Report and Literature Review
Source: Atypon-hosted journal article supplement (doi:10.1176/appi.ajp.2016.15121583), 2017-01-01
Supplement: appi.ajp.2016.15121583.ds001.pdf [file appi.ajp.2016.15121583.ds001.pdf]

**TABLE S1. Initial Programming Settings for Deep Brain Stimulation in a 66-Year-Old Man With Parkinson's Disease**

|                              | Visit 1                                                   |         | 2                                                    |         | 3                                            |         |                |         | 4              |         | 5                                                                                                                                          |         | 6                                                     |         |                                |            | 7                                                                                              | 8                                                                                                      |            | 9                               |            |  |
|------------------------------|-----------------------------------------------------------|---------|------------------------------------------------------|---------|----------------------------------------------|---------|----------------|---------|----------------|---------|--------------------------------------------------------------------------------------------------------------------------------------------|---------|-------------------------------------------------------|---------|--------------------------------|------------|------------------------------------------------------------------------------------------------|--------------------------------------------------------------------------------------------------------|------------|---------------------------------|------------|--|
|                              | Feb 2013                                                  |         | June 2013                                            |         | July 2013<br>Initial settings                |         | Final settings |         | July 2013      |         | July 2014<br>No programming changes                                                                                                        |         | Aug 2014<br>Initial settings                          |         | Final settings                 |            | Aug 2014<br>Psychiatric<br>Evaluation                                                          | Aug 2014                                                                                               |            | Oct 2014                        |            |  |
| <b>DBS Parameters</b>        | Left                                                      | Right   | L                                                    | R       | L                                            | R       | L              | R       | L              | R       | L                                                                                                                                          | R       | L                                                     | R       | L                              | R          | Complained of cognitive decline. Denied all other psychiatric symptoms except mild depression. | L                                                                                                      | R          | L                               | R          |  |
| PW (µs)                      | 60                                                        | 60      | 60                                                   | 60      | 60                                           | 60      | 90             | 90      | 90             | 90      | 90                                                                                                                                         | 90      | 90                                                    | 90      | 90                             | 60         |                                                                                                | 90                                                                                                     | 60         | 90                              | 60         |  |
| FR (Hz)                      | 130                                                       | 130     | 130                                                  | 130     | 130                                          | 130     | 180            | 180     | 180            | 180     | 180                                                                                                                                        | 180     | 180                                                   | 180     | 130                            | 130        |                                                                                                | 130                                                                                                    | 130        | 130                             | 130        |  |
| Amp (V)                      | 1.7                                                       | 1.8     | 2.0*                                                 | 2.0*    | 2.5                                          | 2.4     | 2.5            | 2.5     | 2.0*           | 2.0*    | 2.7*                                                                                                                                       | 2.7*    | 2.3*                                                  | 2.3*    | 2.5                            | 3.0        |                                                                                                | 2.7                                                                                                    | 3.0        | 2.7                             | 2.8        |  |
| Contacts                     | C+, 1-                                                    | C+, 10- | C+, 1-                                               | C+, 10- | C+, 1-                                       | C+, 10- | C+, 2-         | C+, 10- | C+, 2-         | C+, 10- | C+, 2-                                                                                                                                     | C+, 10- | C+, 2-                                                | C+, 10- | C+,2-,3-                       | C+,10-,11- |                                                                                                | C+,2-,3-                                                                                               | C+,10-,11- | C+,2-,3-                        | C+,10-,11- |  |
| R (Ω)                        | 1000*                                                     | 1000*   | **                                                   | **      | *                                            | *       | 1480           | 1342    | **             | **      | 1480                                                                                                                                       | 1342    | 1347                                                  | 1148    | 848                            | 774        |                                                                                                | 878                                                                                                    | 769        | 870                             | 826        |  |
| TEED                         | 22.54                                                     | 25.72   | 31.20                                                | 31.20   | 48.75                                        | 44.92   | 68.41          | 75.44   | 43.78          | 48.28   | 79.79                                                                                                                                      | 88.00   | 63.62                                                 | 74.65   | 86.23                          | 90.69      |                                                                                                | 97.14                                                                                                  | 91.28      | 98.03                           | 74.03      |  |
| <b>Medications</b>           |                                                           |         |                                                      |         |                                              |         |                |         |                |         |                                                                                                                                            |         |                                                       |         |                                |            |                                                                                                |                                                                                                        |            |                                 |            |  |
| amantadine                   | 100mg QID                                                 |         | 100mg BID                                            |         | 100mg BID                                    |         | 100mg BID      |         | 100mg BID      |         | 100mg TID                                                                                                                                  |         | 100mg TID                                             |         | 100mg TID                      |            |                                                                                                | 100mg TID                                                                                              | 100mg TID  |                                 | 100mg TID  |  |
| carbidopa-levodopa 25/100    | 1/2 tab 6x/day                                            |         | 1/2 tab QID                                          |         | 1/4 tab TID                                  |         | 1/4 tab TID    |         | 1/4 tab TID    |         | D/C                                                                                                                                        |         | D/C                                                   |         | D/C                            |            |                                                                                                | D/C                                                                                                    | D/C        |                                 | D/C        |  |
| carbidopa-levodopa CR 50/200 | 1/2 tab 5 x/day with 1 tab q HS                           |         | D/C***                                               |         | D/C                                          |         | D/C            |         | D/C            |         | D/C                                                                                                                                        |         | D/C                                                   |         | D/C                            |            | D/C                                                                                            | D/C                                                                                                    |            | D/C                             |            |  |
| selegiline                   | 5mg BID                                                   |         | 5mg BID                                              |         | 5mg BID                                      |         | 5mg BID        |         | 5mg BID        |         | D/C**                                                                                                                                      |         | D/C                                                   |         | D/C                            |            | D/C                                                                                            | D/C                                                                                                    |            | 5mg BID                         |            |  |
| entacapone                   | 200mg 6x/day                                              |         | D/C***                                               |         | D/C                                          |         | D/C            |         | D/C            |         | D/C                                                                                                                                        |         | D/C                                                   |         | D/C                            |            | D/C                                                                                            | D/C                                                                                                    |            | D/C                             |            |  |
| pramipexole                  | 1.5mg TID                                                 |         | 1mg TID                                              |         | 1.5mg TID                                    |         | 1.5mg TID      |         | 1.5mg TID      |         | 1mg TID                                                                                                                                    |         | 1mg TID                                               |         | 1mg TID                        |            | 1mg TID                                                                                        | 1mg TID                                                                                                |            | 1.5mg TID                       |            |  |
| clonazepam                   | 1mg q HS                                                  |         | 1.5mg q HS                                           |         | 1.5mg q HS                                   |         | 1.5mg q HS     |         | 1.5mg q HS     |         | 1.5mg q HS                                                                                                                                 |         | 1.5mg q HS                                            |         | 1.5mg q HS                     |            | 1.5mg q HS                                                                                     | 1.5mg q HS                                                                                             |            | 1mg q HS                        |            |  |
| <b>Notes</b>                 | *1000 used as estimated impedance for calculation of TEED |         | *amplitude was increased per patient home programmer |         | Acting out and angry, crushed his eyeglasses |         |                |         | Anger resolved |         | Increased irritability, anger outbursts, cognitive decline, paranoid delusions, visual hallucinations, disinhibition, talkative, impulsive |         | *Amp had been decreased using patient home programmer |         | Mood and irritability improved |            |                                                                                                | Mild depressive symptoms improved, no return of previous mood and behavioral concern, "so much better" |            | Mood and behavior remain stable |            |  |

|  |  |                                                            |                                                           |  |                                                                                                                    |                                                                                                                                  |  |  |  |  |  |
|--|--|------------------------------------------------------------|-----------------------------------------------------------|--|--------------------------------------------------------------------------------------------------------------------|----------------------------------------------------------------------------------------------------------------------------------|--|--|--|--|--|
|  |  | **1000 used as estimated impedance for calculation of TEED | *1000 used as estimated impedance for calculation of TEED |  | *decreased to mitigate dyskinesia                                                                                  | *Amp had been increased using patient home programmer                                                                            |  |  |  |  |  |
|  |  | ***due to increased dyskinesia                             |                                                           |  | **estimated impedances at (1480 and 1342) for left STN and right STN respectively for purposes of calculating TEED | **Pt reported stopping selegiline due to concerns it was contraindicated with cyclobenzaprine which his PCP had recently started |  |  |  |  |  |
